# Supplementary material for: Strategic design of vacancies and phase in flexible MoS 2 for boosting triiodide reduction performance
Source: Royal Society of Chemistry journal article supplement (doi:10.1039/d4qi02986k), 2025-01-01
Supplement: d4qi02986k2.pdf [file d4qi02986k2.pdf]

# Supporting information

1

## 2 Experimental section

### 3 Preparation of $(\text{NH}_4)_2\text{MoS}_4$

4 Ammonium tetrathiomolybdate  $((\text{NH}_4)_2\text{MoS}_4)$  was obtained by ammonium molybdate  
5  $((\text{NH}_4)_6\text{Mo}_7\text{O}_{24}\cdot 4\text{H}_2\text{O})$  and ammonium sulfide  $((\text{NH}_4)_2\text{S})$  according to a previously reported method. In a  
6 standard experimental procedure, 10 g  $(\text{NH}_4)_6\text{Mo}_7\text{O}_{24}\cdot 4\text{H}_2\text{O}$  (0.008 mol) was dissolved in 40 mL distilled (DI)  
7 water and subsequently combined with 12 mL of ammonia solution. The resulting mixture was heated to 45  
8 °C and stirred for 30 minutes. Then, 108 mL  $(\text{NH}_4)_2\text{S}$  solution of 14% mass fraction was added to the above  
9 solution, stirred at 65 °C for 1 h to obtain blood red liquid. The reaction was cooled to 0 °C for crystallization  
10 for 6 h, and then filtered with a Brinell funnel. During the filtering, 240 mL cold DI water was used for washing  
11 three times, and then 120 mL anhydrous ethanol was used for washing three times. The product was dried in  
12 a vacuum drying oven at 50 °C for 12 h. The product was a brownish red needle-like solid, which was  
13  $(\text{NH}_4)_2\text{MoS}_4$ . The reaction equation in the synthesis process is as follows:

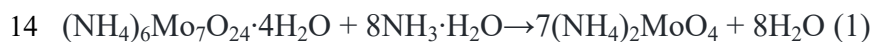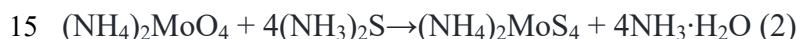

### 16 Preparation of the $\text{MoS}_2$ films

17  $\text{MoS}_2$  was prepared by electro-deposition method on ITO-PET flexible substrate. The electrolyte consists of  
18 5 mM  $(\text{NH}_4)_2\text{MoS}_4$  and 0.1M KCl in DI water. Graphite plate and ITO-PET substrate were used as the  
19 anodic and cathodic electrodes. The electro-deposition voltage was controlled at 1.1V.  $\text{MoS}_2$  was prepared  
20 by electro-deposition with a series times ( $\text{MoS}_2$ -x min, x:2, 5, 10, 20) at different temperatures ( $\text{MoS}_2$ -x °C,  
21 x: 15, 20, 25). For the time-dependent experiments, the temperature was kept at 20 °C. And the  
22 temperatures-dependent experiments, the time was kept at 10 min, while the electro-deposition temperature  
23 was changed as desired. The Pt counter electrode was prepared by electrodeposition as a reference.

### 24 Synthesis of etching $\text{MoS}_2$ films

25  $\text{MoS}_2/\text{ITO-PET}$  was immersed in  $\text{H}_2\text{O}_2$  solution with a series of temperatures ( $\text{MoS}_2$ -x °C, x: 0, 15, 25,  
26 35) inside which  $\text{MoS}_2/\text{ITO-PET}$  was allowed to react with  $\text{H}_2\text{O}_2$  for varied concentrations ( $\text{MoS}_2$ -x mol/L,  
27 x:0.01, 0.1,1) at different times ( $\text{MoS}_2$ -x s, x:30, 60, 90, 120). For the temperature-dependent experiments, the  
28 time and solution concentration were kept at 60 s and 0.1 mol/L, while the  $\text{H}_2\text{O}_2$  temperature was changed as  
29 desired. In the same way, for the concentration dependent experiments, the time and temperature were kept at  
30 60 s and 15 °C, while the  $\text{H}_2\text{O}_2$  concentration was changed as at the set. For the time-dependent experiments,  
31 the temperature and solution concentration were kept at 15 °C and 0.1 mol/L, while the  $\text{H}_2\text{O}_2$  time was changed  
32 as needed.

### 33 **Characterization**

34 The morphologies of MoS<sub>2</sub> nanoparticle were characterized by SEM (Hitachi S-8010, Japan) at an  
35 accelerating voltage of 5kV. The detailed information of MoS<sub>2</sub> element compositions were obtained by EDX.  
36 XRD (D/teX Ultra 250) measurements were performed to the crystal structure of MoS<sub>2</sub> film in the range of  
37 10-80° and the test speed was 5°/min. Raman (HORIBA EVOLUTION) spectroscopy measurements are made  
38 at excitation wavelength of 532 nm and test range of 100-600cm<sup>-1</sup>. The chemical states of molybdenum and  
39 sulfur were measured by XPS (ECASA LAB 250Xi) photoelectron spectrometer. To explore the effect of  
40 etching treatment on MoS<sub>2</sub> transparency, the UV-vis (jinghua UV-1800PC) adsorption spectra were measured.  
41 The FTIR (IRAffinity-1S) spectra of MoS<sub>2</sub> before and after etching were measured.

### 42 **Electrochemical Measurements and Cell fabrication**

43 The Tafel curve, Electrochemical impedance spectra (EIS) and current density-time (I-t) were measured  
44 by an electrochemical workstation (CHI 660E, Shanghai Chenhua). Cyclic voltammograms were obtained in  
45 acetonitrile solution containing 10 mM LiI, 1 mM I<sub>2</sub>, and 0.1 M LiClO<sub>4</sub> at 50 mV s<sup>-1</sup> with Ag/Ag<sup>+</sup> electrode,  
46 Pt electrode and prepared electrode were used as reference electrode, counter electrode and working electrode.

47 After the sintering of the prepared photoanode, TiCl<sub>4</sub> treatment was performed at 450 °C for 30 min.  
48 When it cools down, the TiCl<sub>4</sub>-treated photoanode was dipped in 0.3 mM N719 dye as explained above for  
49 24 h. The CEs were prepared by electrodeposition on ITO-PET substrates. The electrolyte solution containing  
50 0.03 M I<sub>2</sub>, 0.05 M LiI, 0.1 M guanidinium thiocyanate, 0.5 M 4-tert-Butylpyridine and 0.6 M 1,3-  
51 dimethylimidazolium iodide in acetonitrile and pentonitrile. The photoelectrode and counter electrodes were  
52 assembled together by placing a thermal adhesive film (25 μm Surlyn, Solaronix) in between the electrodes.  
53 An electrolyte is then added between the photoanode and counter electrode to assemble the DSSCs.  
54 Photocurrent-voltage (*J-V*) curves of DSSCs were measured under simulated solar illumination (AM 1.5, 100  
55 mW cm<sup>-2</sup>). In order to investigate the application of DSSCs for indoor photovoltaic applications, the  
56 photocurrent-voltage (*J-V*) curves of DSSCs were measured under simulated indoor light (1000 lux).

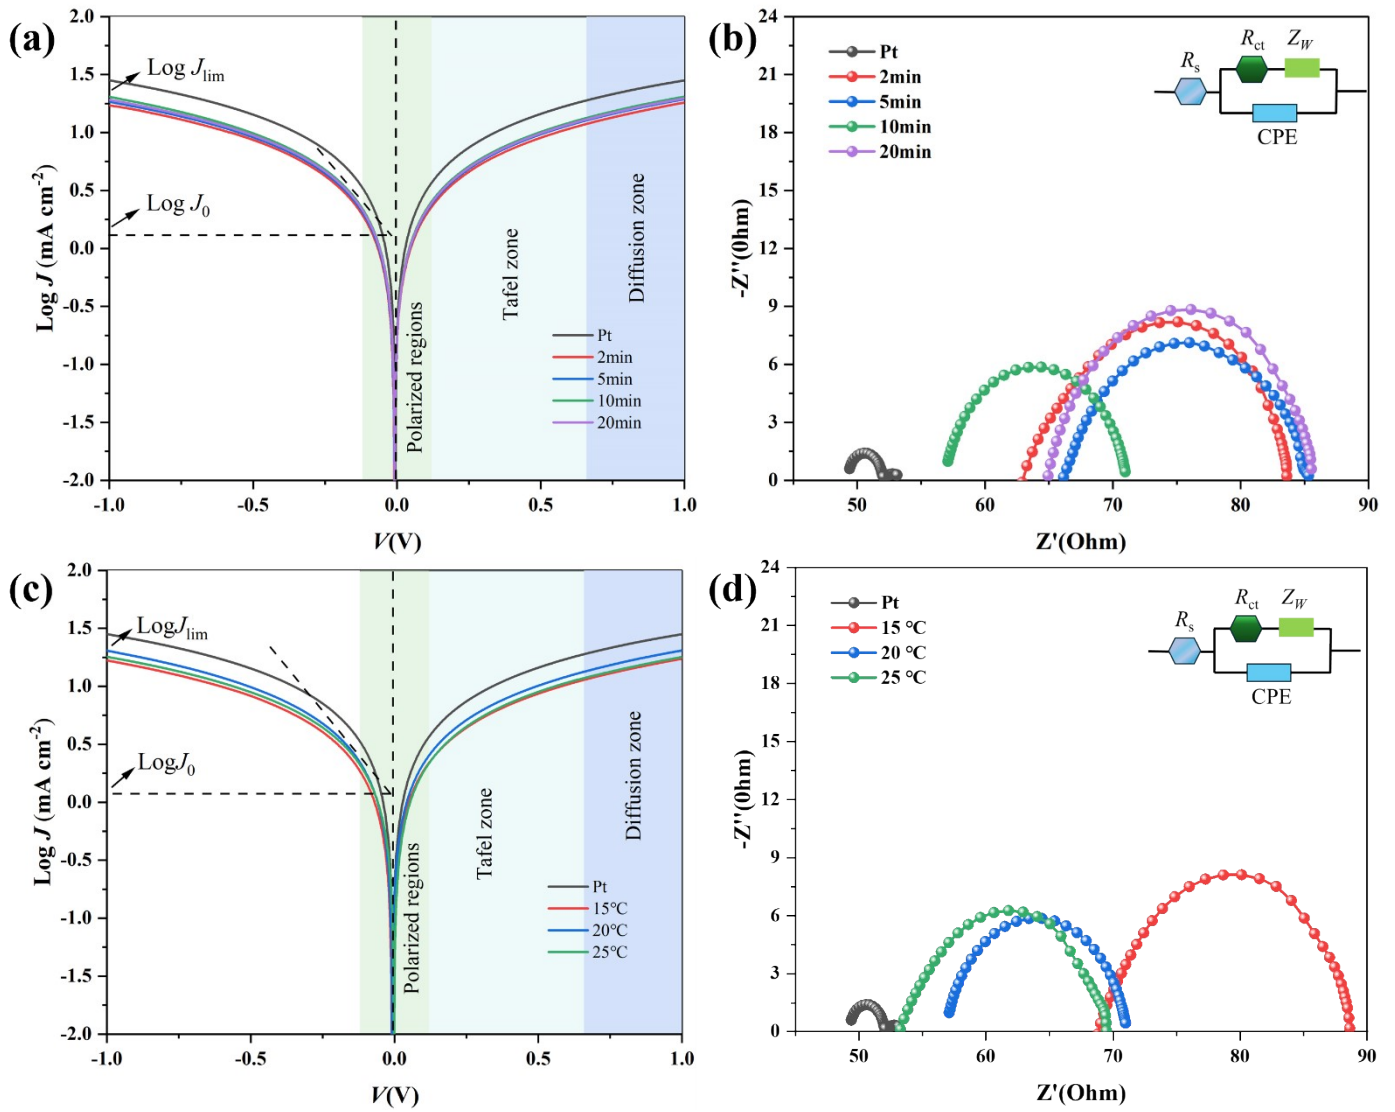

57

58 Figure S1. a-b) Tafel and EIS plots of electrodeposited MoS<sub>2</sub> at different times; c-d) Tafel and EIS plots of electrodeposited  
59 MoS<sub>2</sub> at different temperatures.

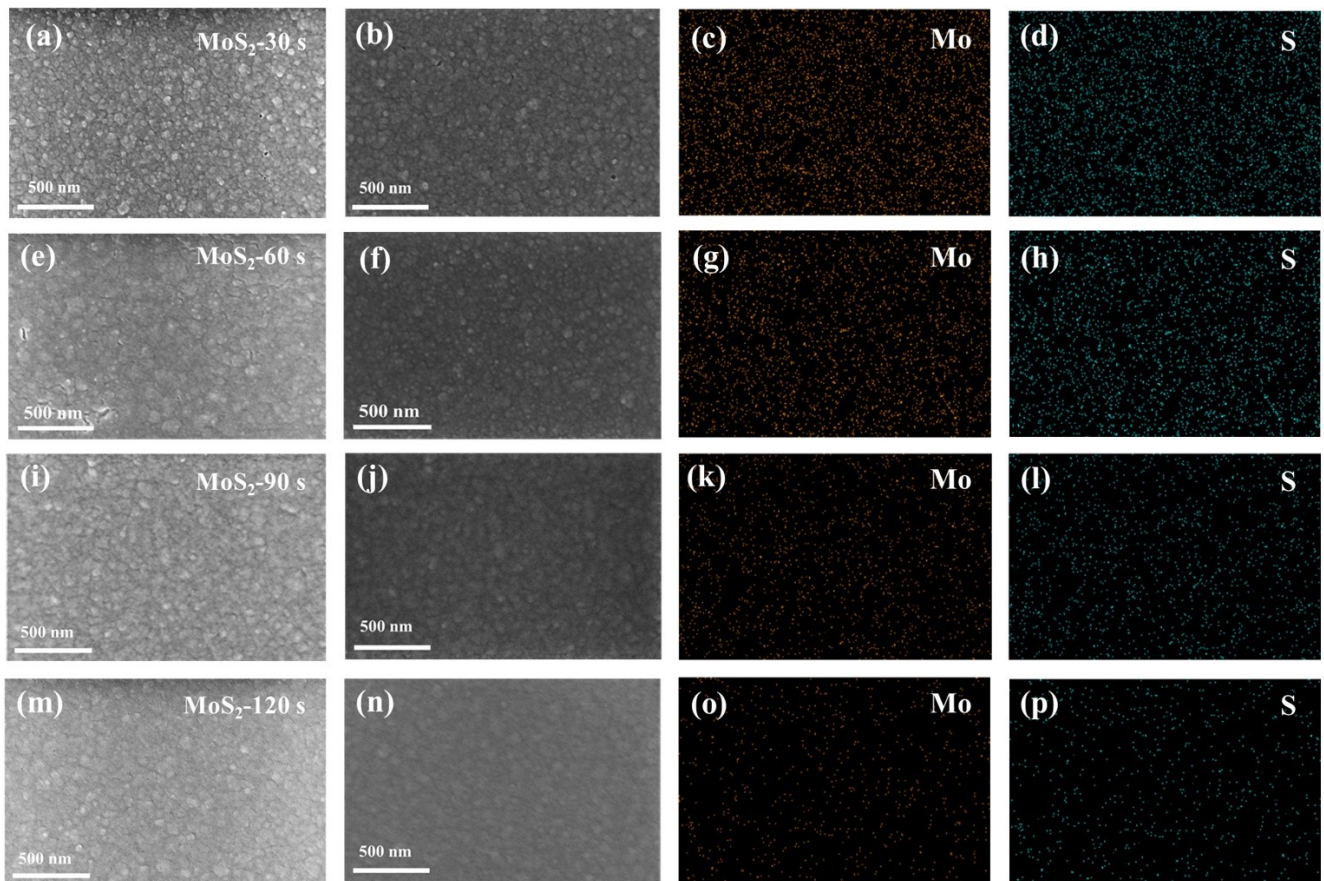

60

61 Figure S2. a) SEM images of MoS<sub>2</sub>-30 s films; b-d) elemental mapping of MoS<sub>2</sub>-30 s films; e) SEM images of MoS<sub>2</sub>-60 s  
 62 films; f-h) elemental mapping of MoS<sub>2</sub>-60 s films; i) SEM images of MoS<sub>2</sub>-90 s films; j-l) elemental mapping of MoS<sub>2</sub>-90 s  
 63 films; m) SEM images of MoS<sub>2</sub>-120 s films; n-p) elemental mapping of MoS<sub>2</sub>-120 s films.

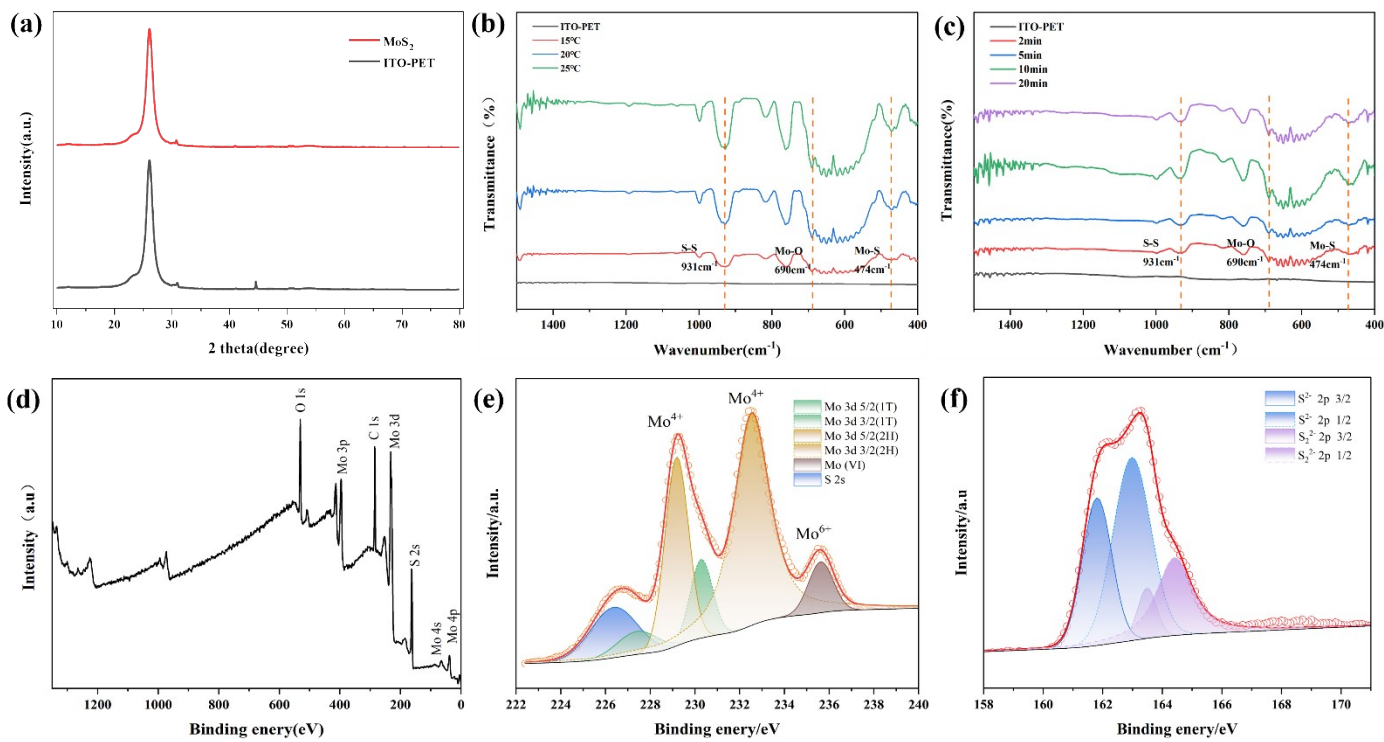

64

65 Figure S3. a) XRD patterns of ITO-PET and unetched MoS<sub>2</sub>; b and c) FTIR spectra of MoS<sub>2</sub> by electrodeposition method  
 66 for different temperatures and times; d) XPS spectra of unetched MoS<sub>2</sub>; e,f) Mo 3d spectra and S 2s spectra of unetched  
 67 MoS<sub>2</sub>.

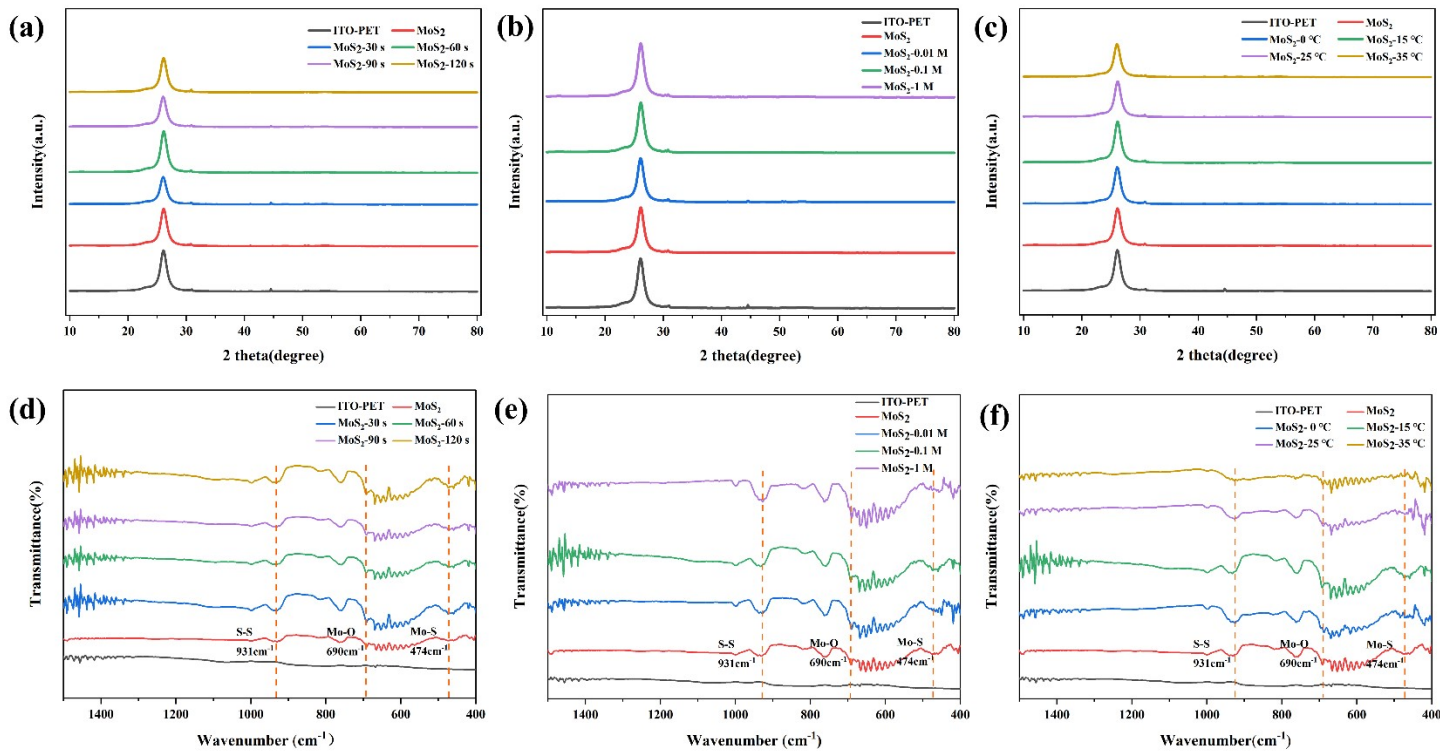

68

69 Figure S4. a, b, c) XRD patterns of unetched MoS<sub>2</sub> and etched MoS<sub>2</sub> by different etching times, etching  
 70 etching temperatures; d, e, f) FTIR spectra of unetched MoS<sub>2</sub> and etched MoS<sub>2</sub> by different etching times, etching  
 71 concentrations and etching temperatures.

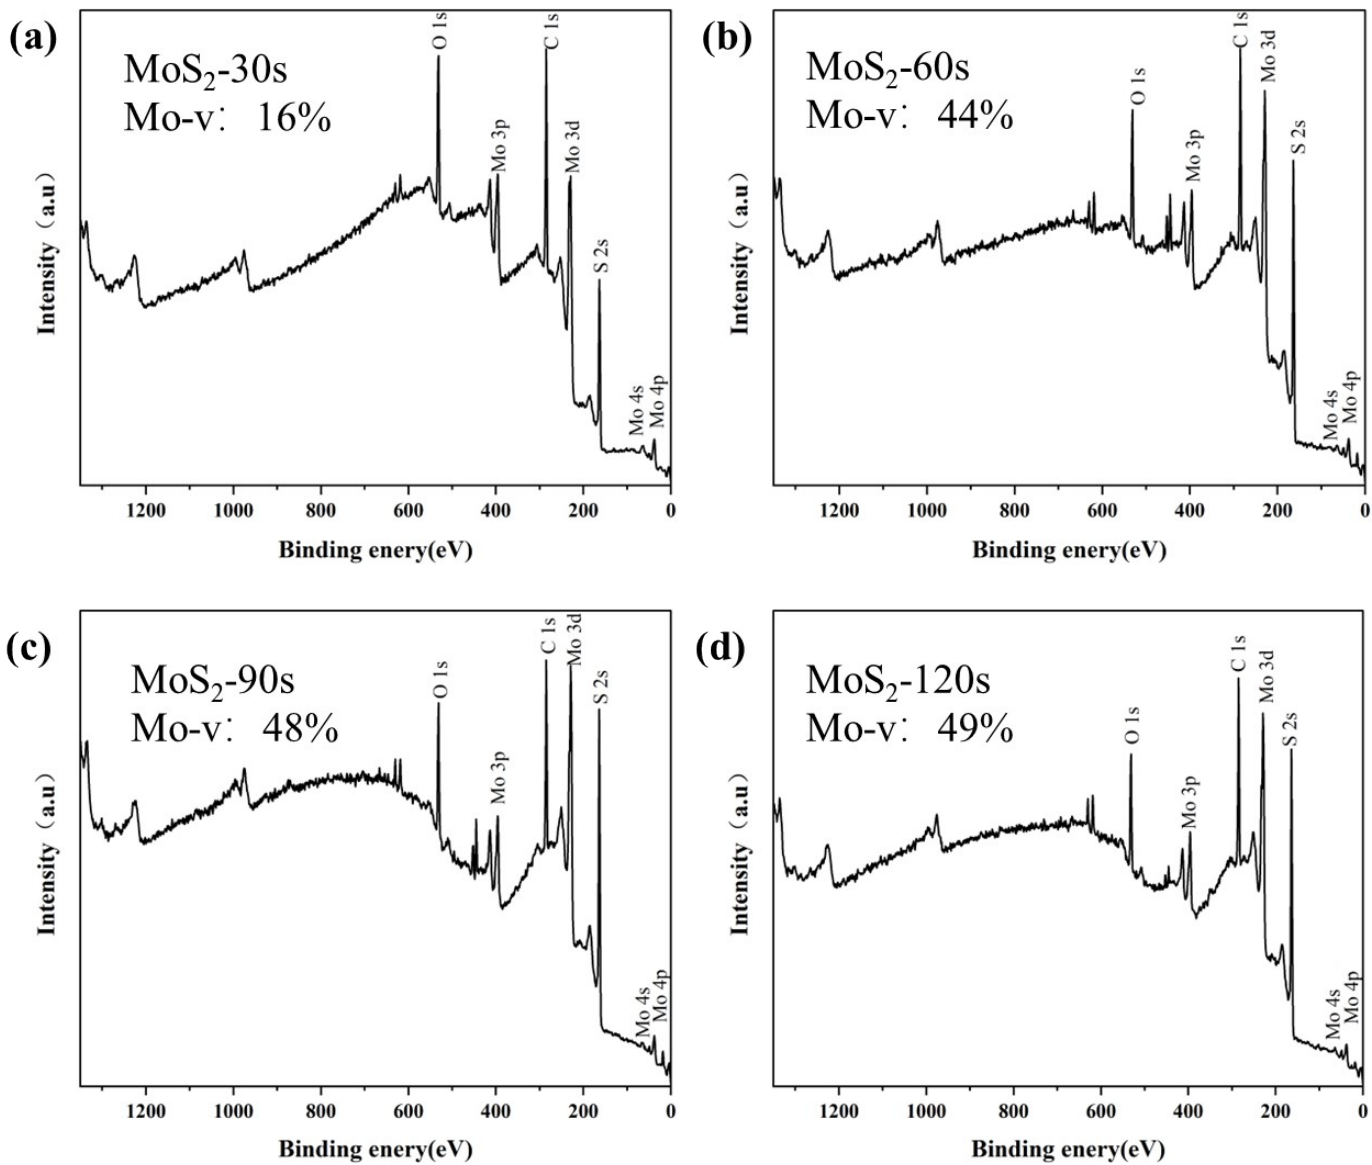

72

73 Figure S5. a, b, c, and d) XPS spectra of MoS<sub>2</sub>-30 s, MoS<sub>2</sub>-60 s, MoS<sub>2</sub>-90 s and MoS<sub>2</sub>-120 s.

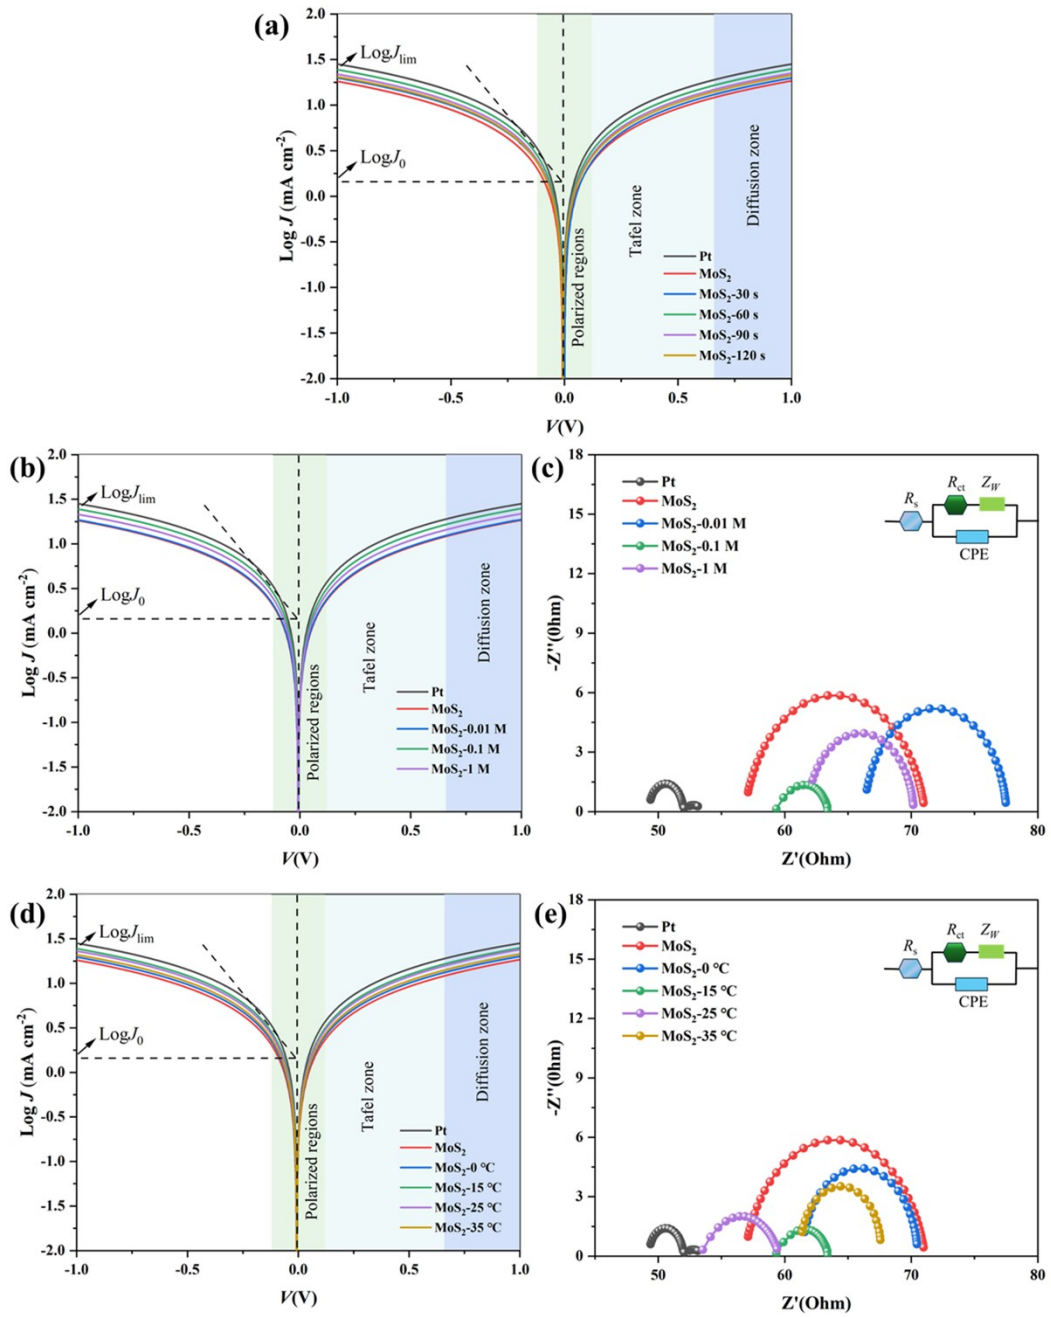

74

75 Figure S6. a) Tafel plots of etching MoS<sub>2</sub> at different times, b-c) Tafel and EIS plots of etching MoS<sub>2</sub> at different  
 76 concentrations, d-e) Tafel and EIS plots of etching MoS<sub>2</sub> at different temperatures.



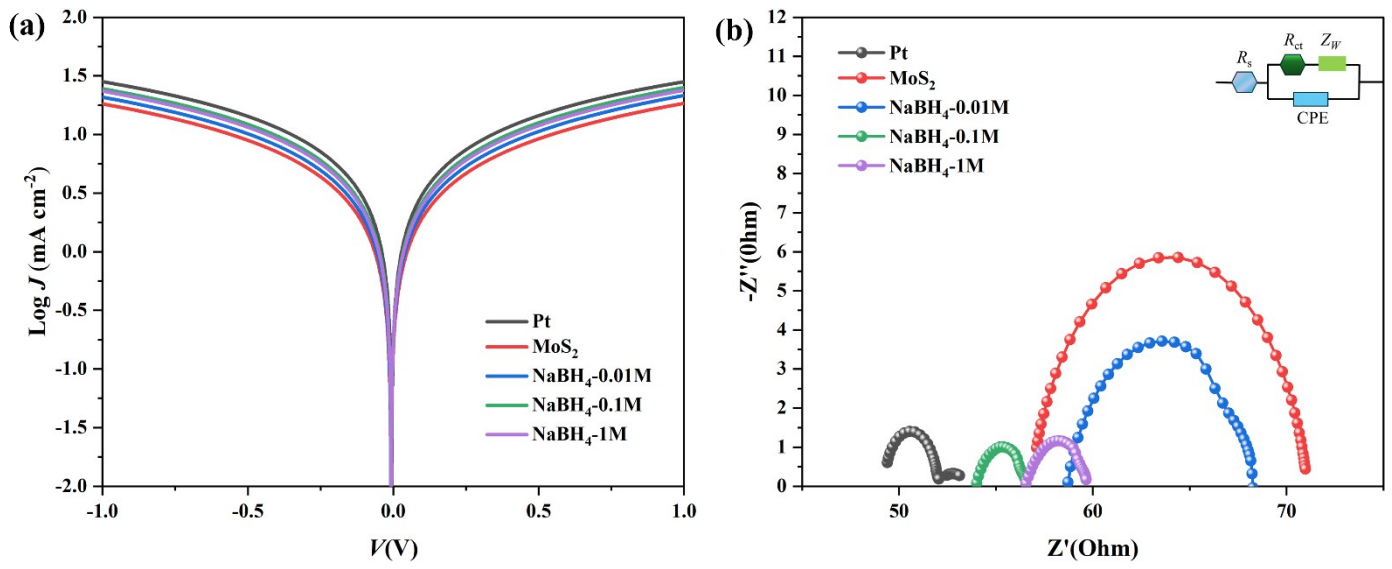

77

78 Figure S7. a,b) Tafel and EIS plots of MoS<sub>2</sub> etched with different concentrations of NaBH<sub>4</sub>.
